# Supplementary material
Source: Research Square preprint supplement (doi:10.21203/rs.3.rs-8946667/v1)
Supplement: Supplementary file 1 [file 830ecb395c3076e84af652ef.xlsx]

## Sheet: Sheet1
ID	fustat	futime	Stages	Volume	Number of lymph nodes	Positive lymph nodes	T	N	M	grade	CD8	PDL1-EX	PDL1	PD1	BRAF mutation(V600E)	KRAS mutation	NRAS mutation G12C/D/S	NRAS mutation Q61R/L/H/K
H01	0	52	1	3.5*3.5*0.5cm	17	0	T2	N0	M0	Ⅱ	0.01	3	0.01	0.03	wt	wt	wt	wt
A15	0	75	2	7.5*6*0.2cm	18	0	T4a	N0	M0	Ⅱ	0.01	1	0.01	<1%	wt	mu	wt	wt
G15	1	8	4	4*2.5cm	13	9	T4b	N2	M1	Ⅱ-Ⅲ	0.1	1.5	0.3	0.1	wt	wt	wt	wt
E01	0	61	2	3.5*3cm	14	0	T3	N0	M0	Ⅱ	0.01	1.5	0.01	0.03	wt	wt	wt	wt
C01	0	66	2	5*4*1cm	15	0	T4b	N0	M0	Ⅱ	0.05	3	0.05	0.05	wt	mu	wt	wt
F05	0	59	2	5.5*5*0.5cm	18	0	T4a	N0	M0	Ⅱ	0.25	3	0.25	0.2	wt	wt	wt	wt
F15	1	29	2	6*5*4cm	9	0	T4b	N0	M0	Ⅱ	0.05	2	0.01	0.01	wt	wt	wt	wt
E17	0	60	3	7*5*0.5cm	22	8	T3	N2	M0	Ⅱ	0.07	2	0.01	0.1	wt	wt	wt	wt
J01	0	49	2	7*3*0.5cm	25	0	T4a	N0	M0	Ⅱ-Ⅲ	0.05	2	0.01	0.05	wt	wt	wt	wt
D05	0	64	2	5*4*0.6cm	13	0	T3	N0	M0	Ⅱ	0.03	1.5	<1%	0.05	wt	wt	wt	wt
A11	1	2	4	7*3.8*0.5cm	16	2	T4b	N1	M1	Ⅱ	0.05	1.5	0.01	<1%	wt	wt	wt	wt
J05	0	47	3	8.5*4*2cm；6.5*5.5*2.8cm	25	9	T4b	N2	M0	1.Ⅱ ；2.Ⅲ	0.005	1	0.05	<1%	wt	wt	wt	wt
H15	0	51	2	4.5*3*1.5cm	25	0	T4a	N0	M0	Ⅱ	0.05	3	0.1	0.07	wt	wt	wt	wt
A05	1	47	2	6*3.1*0.6cm	17	0	T3	N0	M0	Ⅱ	0.02	1.5	0.01	<1%	wt	wt	wt	wt
J09	1	10	3	4.5*4.5*0.4cm	16	7	T4a	N2	M0	Ⅲ	0.01	1	0.01	<1%
F17	0	55	1	3.5*3*1.5cm	11	0	T2	N0	M0	Ⅱ	0.03	1.5	0.01	0.03	wt	wt	wt	wt
B05	1	51	3	6*5.5*0.3cm	20	9	T4a	N2	M0	Ⅲ	0.005	1	<1%	0	wt	wt	wt	wt
F13	1	31	2	7*6*2cm	19	0	T3	N0	M0	Ⅱ-Ⅲ	0.01	1.5	<1%	0.01	wt	wt	wt	wt
J14	0	64	2	3*3*0.3cm	15	0	T4a	N0	M0	Ⅱ	0.01	2	0.02	0.02	wt	wt	wt	wt
J07	0	47	1	3*2.5*1cm	18	0	T2	N0	M0	Ⅱ	0.15	2	0.02	0.02
G03	0	54	1	4*4*2.5cm	11	0	T2	N0	M0	Ⅱ	0.15	2	<1%	0.07
E11	0	60	2	5*5*0.7cm	12	0	T3	N0	M0	Ⅱ-Ⅲ	0.02	1.5	<1%	0.02	wt	wt	wt	wt
I17	0	49	2	6*4.5*2cm	34	0	T4a	N0	M0	Ⅱ-Ⅲ	0.05	2	0.6	0.03	wt	wt	wt	wt
G17	0	53	2	6*5*1.5cm	34	0	T3	N0	M0	Ⅱ	0.02	2	<1%	0.03	wt	wt	wt	wt
E03	1	28	3	3.5*2.5cm	11	0	T3	N1c	M0	Ⅱ	0.02	0	0	0.02	wt	wt	wt	wt
H11	0	52	1	8*4*3.5cm	15	0	T2	N0	M0	Ⅱ-Ⅲ	0.01	1.5	0.05	<1%	wt	mu	wt	wt
B13	0	68	2	5.5*4.5*0.2cm	25	0	T3	N0	M0	Ⅱ	0.02	1.5	0.01	0.02	wt	wt	wt	wt
J13	0	70	1	5.5*5.5*1.5cm	29	0	T2	N0	M0	Ⅱ-Ⅲ	0.005	1.5	<1%	<1%	wt	wt	wt	wt
C09	0	66	2	6*4*1cm	16	0	T4a	N0	M0	Ⅱ	0.02	1.5	<1%	0.01	wt	wt	wt	wt
D17	0	61	2	11*10.5*7cm	15	0	T3	N0	M0	Ⅲ	0.2	2	0.35	0.2	wt	wt	wt	wt
A09	0	75	2	12.5*5.5*1cm	20	0	T3	N0	M0	Ⅱ	0.03	2	0.05	0.01	wt	wt	wt	wt
C17	0	64	2	5*5*1cm	33	0	T4a	N0	M0	Ⅱ	0.05	3	0.01	0.07	wt	wt	wt	mu
B17	0	67	2	4.5*3*1cm	26	0	T4a	N0	M0	Ⅱ-Ⅲ	0.07	2	0.01	0.07	wt	mu	wt	wt
G11	1	11	4	3*3*l.5cm	7	2	T4a	N1	M1	Ⅱ	0.03	2	0.05	0.01
B09	0	69	2	6*4.5*0.7cm	18	0	T4a	N0	M0	Ⅱ	0.05	2	0.01	0.05	wt	mu	wt	wt
D03	1	10	3	5*3.5*0.8cm	11	8	T4a	N2	M0	Ⅱ-Ⅲ	0.01	1.5	0.1	<1%	mu	mu	wt	wt
A07	0	76	2	4*3.5*0.8cm	13	0	T3	N0	M0	1.Ⅱ-Ⅲ ；2.Ⅱ	0.01	2	<1%	<1%	wt	wt	wt	wt
J03	0	48	1	6.3*4.5*1.9cm	7	0	T2	N0	M0	Ⅱ	0.07	3	0.01	0.07
I07	0	51	2	10.5*5*1.8cm	11	0	T3	N0	M0	Ⅲ	0.05	2	0.3	0.07	wt	mu	wt	wt
J12	0	76	2	5*3*1.2cm	19	0	T3	N0	M0	Ⅱ	0.05	3	0.01	0.01	wt	wt	wt	wt
E07	1	25	3	4*5*1cm	25	4	T4b	N2	M0	Ⅱ-Ⅲ	0.005	2	0.1	0	wt	mu	wt	wt
J15	0	54	1	5*4*3.5cm	27	0	T2	N0	M0	Ⅱ	0.07	2	0.01	0.05	wt	mu	wt	wt
B11	0	68	2	5*5*3cm	17	0	T4a	N0	M0	Ⅱ	0.02	1	<1%	<1%	wt	mu	wt	wt
J16	1	14	3	4*3*2.8cm	23	9	T4b	N2	M0	Ⅱ-Ⅲ	0.05	0	0	0.05	wt	mu	wt	wt
H17	0	51	4	9.5*7cm	23	0	T4a	N0	M1	Ⅱ	0.05	3	0.25	0.05	wt	wt	wt	wt
C15	1	9	2	4*3.5*0.5cm	10	0	T4a	N0	M0	Ⅱ-Ⅲ	0.005	0	0	<1%	wt	wt	wt	wt
E15	0	60	3	3.5*2.5*1.5cm	15	3	T4a	N1	M0	Ⅱ	0.03	1.5	0.01	0.01	wt	wt	wt	wt
D13	0	62	3	6.5*3*1cm	29	1	T3	N1	M0	Ⅱ	0.03	2	<1%	0.03	wt	wt	wt	wt
J11	1	23	3	9*5*3cm	20	1	T4a	N1	M0	Ⅱ-Ⅲ	0.15	3	1	<1%	wt	wt	wt	wt
H05	0	52	2	5.5*4.5*3cm	28	0	T4a	N0	M0	Ⅱ	0.01	2	0.01	0.01	wt	wt	wt	wt
D15	0	61	1	9*6*3.5cm	43	0	T2	N0	M0	Ⅱ	0.005	1	<1%	0.01	wt	wt	wt	wt
J18	1	2	3	4.5*3cm		9	T3	N2	M0	Ⅱ-Ⅲ	0.02	1	0.01	<1%
C05	0	66	3	4*3.6*0.2cm	15	2	T3	N1	M0	Ⅱ	0.02	2	0.01	0.05	wt	mu	wt	wt
H03	0	52	2	7*5.5*2cm	19	0	T4a	N0	M0	Ⅱ	0.01	1.5	<1%	0.01	wt	mu	wt	wt
C07	0	66	3	5*4*3cm	23	3	T4a	N1	M0	Ⅱ	0.01	1	0.05	0.01	wt	wt	wt	wt
D07	0	63	2	3*3*0.5cm；2.6*2.2*1.6cm	30	0	T4a	N0	M0	Ⅱ-Ⅲ	0.01	1	0.01	0.03	wt	wt	wt	wt
I03	0	51	2	9*6*2cm	22	0	T4a	N0	M0	Ⅱ-Ⅲ	0.1	2.5	1	0.05	wt	wt	wt	wt
E09	0	60	2	4.5*3.5*2cm	17	0	T3	N0	M0	Ⅱ	0.03	1.5	<1%	0.02	wt	mu	wt	wt
G09	0	53	2	7*7*2cm	18	0	T3	N0	M0	Ⅱ	0.01	1	<1%	0.01	wt	wt	wt	wt
A17	1	19	3	8*4*4cm	19	2	T4a	N1	M0	Ⅱ	0.05	——	——	0.01	wt	wt	wt	wt
I05	1	13	3	4.5*4*1cm	18	4	T4a	N2	M0	Ⅱ-Ⅲ	0.005	1.5	<1%	0.01
G07	1	10	3	3.5*3*0.5cm	14	6	T4a	N2	M0	Ⅱ	0.05	1	<1%	0.03
J17	1	4	3	9.5*4*1cm	52	7	T4a	N2	M0	Ⅲ	0.01	1.5	0.15	0.01
G13	1	17	3	4*2.5*0.5cm；1.5*l*0.8cm	10	5	T4a	N2	M0	Ⅱ	0.03	1	<1%	0.03	wt	wt	wt	mu
I11	1	24	2	4*3.5*2cm	12	0	T3	N0	M0	Ⅱ	0.01	2	0.05	0.02	wt	mu	wt	wt
E13	0	60	3	6.5*4.5*3cm	34	1	T3	N1	M0	Ⅱ	0.01	1.5	<1%	0.02	wt	wt	wt	wt
H07	1	26	2	7.5*7*1.5cm	10	0	T4a	N0	M0	Ⅱ-Ⅲ	0.05	2	0.01	0.03	wt	wt	wt	wt
H13	0	52	2	6.5*6*1cm	31	0	T3	N0	M0	Ⅱ	0.05	3	0.15	0.15	wt	wt	wt	wt
B03	0	74	3	6*3*0.5cm	21	1	T4a	N1	M0	Ⅱ-Ⅲ	0.01	1	<1%	<1%	wt	mu	wt	wt
F09	0	59	2	3*2.5*1.8cm	16	0	T3	N0	M0	Ⅱ	0.03	1.5	<1%	0.02	wt	wt	wt	wt
G05	0	54	3	3.5*5*1cm	12	1	T4a	N1	M0	Ⅱ	0.005	2	<1%	0	wt	mu	wt	wt
B07	1	1	2		10	0	T3	N0	M0	Ⅱ-Ⅲ	0.01	1	<1%	<1%
F07	0	59	2	7*6*1cm	37	0	T4a	N0	M0	Ⅱ-Ⅲ	0.03	1.5	0.1	0.05	wt	wt	wt	wt
E05	0	61	3	3.5*3*1cm	28	2	T4a	N1	M0	Ⅱ-Ⅲ	0.05	3	<1%	0.05	wt	mu	wt	wt
C11	1	9	2	6.5*6.5*2cm	12	0	T4a	N0	M0	Ⅱ-Ⅲ	0.03	2	0.05	0.03	wt	wt	wt	wt
I13	0	50	3	7.5*5.5*0.8cm	13	5	T3	N2	M0	Ⅱ	0.005	2	<1%	<1%	wt	mu	wt	wt
A13	1	0.37	2	4.5*4.5*4cm	28	0	T4a	N0	M0	Ⅱ-Ⅲ	0.005	2	0.02	<1%	wt	wt	wt	wt
A03	1	22	3	7*5*2.5cm；6*3*1cm、2.5*2*1cm	75	1	T4b	N1	M0	Ⅱ-Ⅲ	0.01	1	<1%	<1%	wt	wt	wt	wt
H09	0	52	4	9*6.5cm	13	0	T4a	N0	M1	Ⅱ-Ⅲ	0.005	1.5	0.01	<1%	wt	mu	wt	wt
