# Supplementary material
Source: Research Square preprint supplement (doi:10.21203/rs.3.rs-8946667/v1)
Supplement: Supplementary file 1 [file d1724fd35ae0322f5b920f61.docx]

**Supplemental figure1**

**
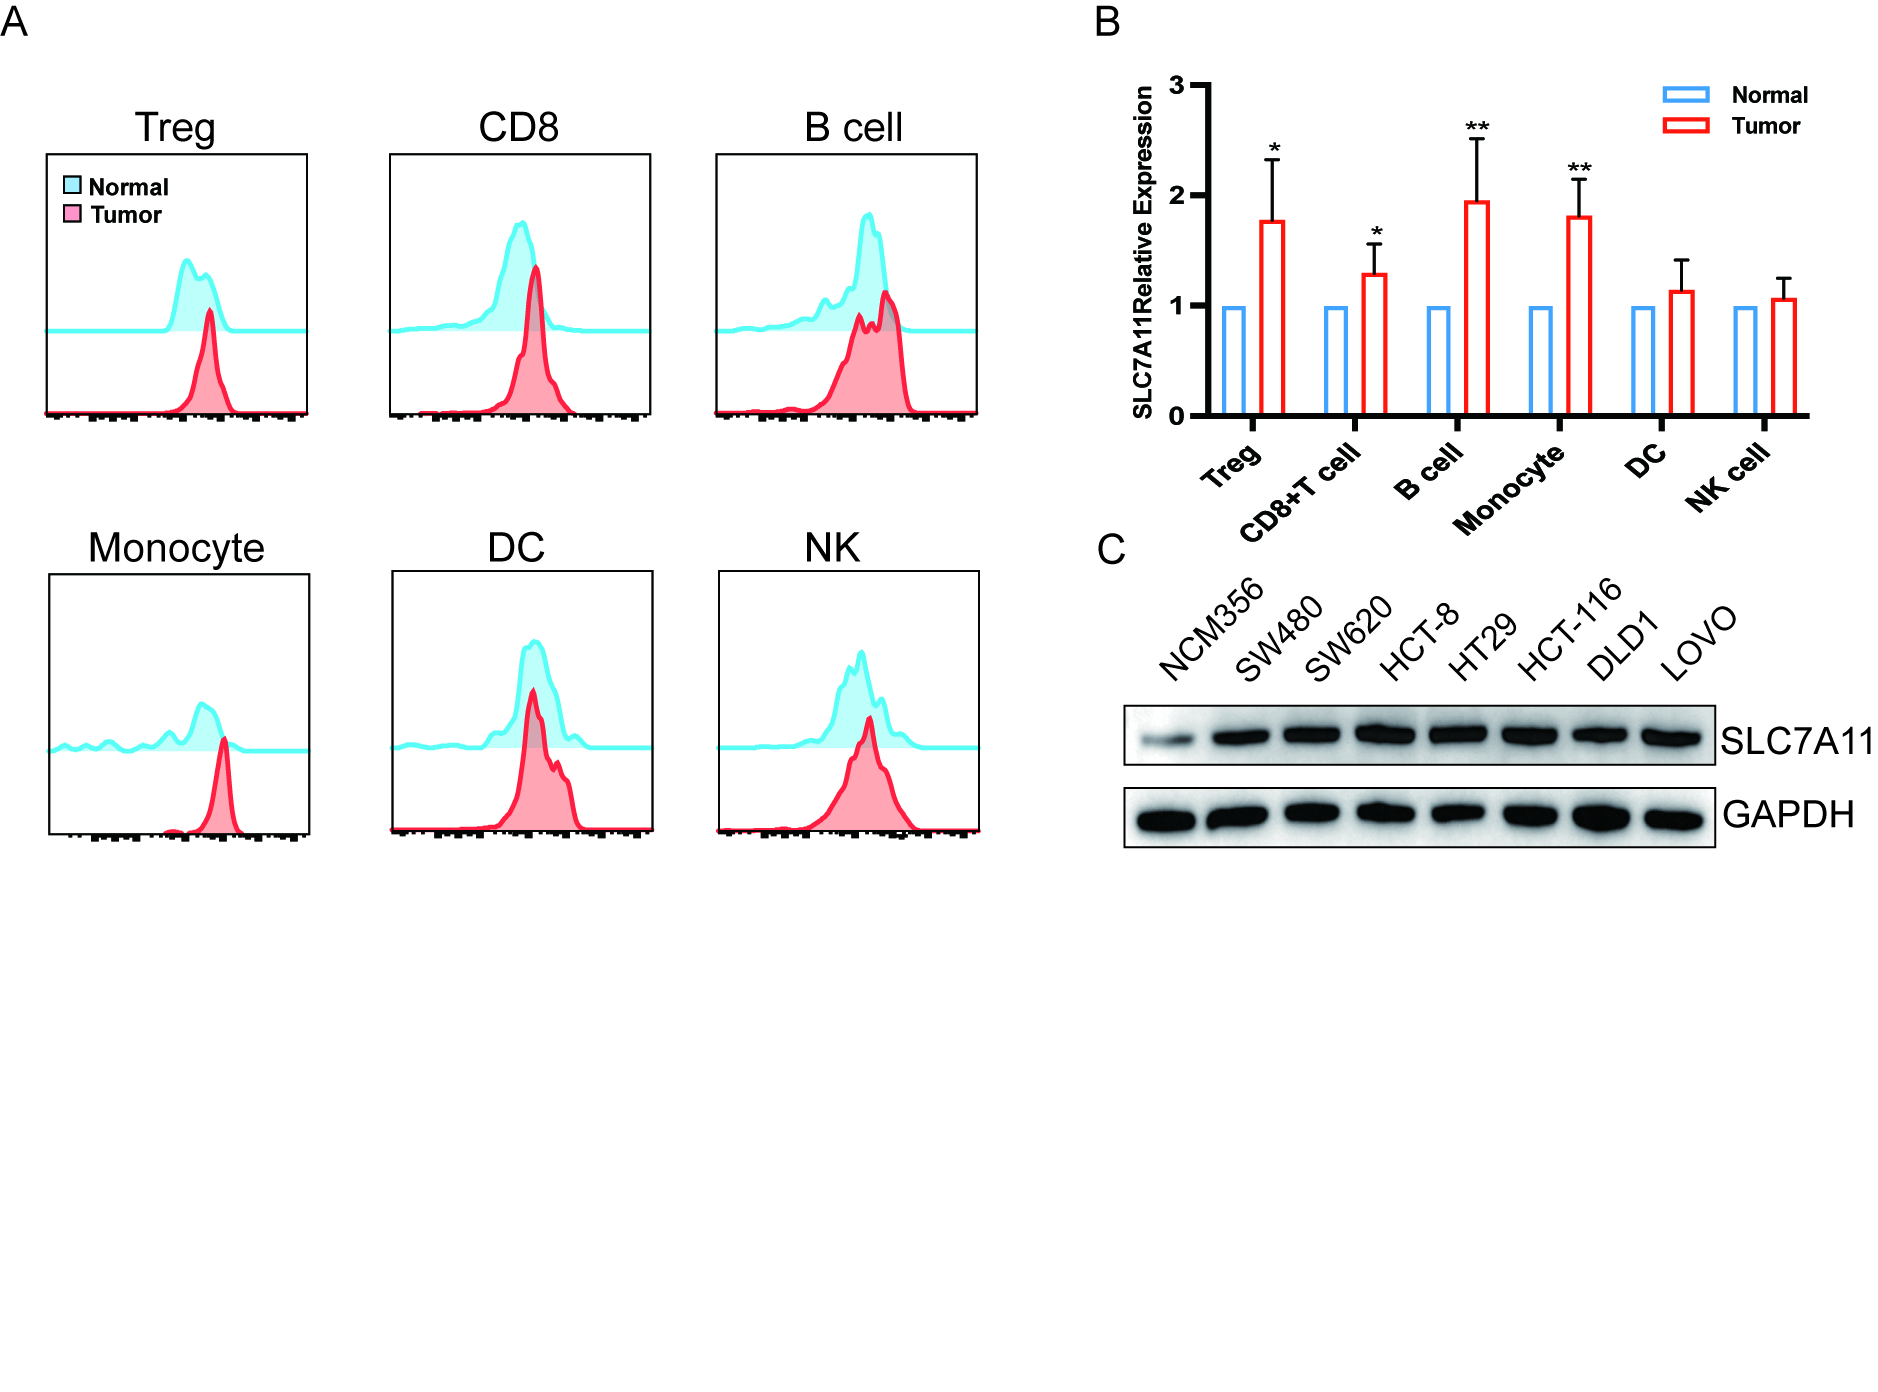
**

**Supplemental figure 1. Aberrantly Overexpression of SLC7A11 in CRC**

(A-B) Flow cytometry analysis of SLC7A11 expression in different cells from colorectal cancer and adjacent normal tissues.

(C) Western blot (WB) analysis of SLC7A11 expression levels in different colorectal cancer cell lines.

**Supplemental figure2**

**
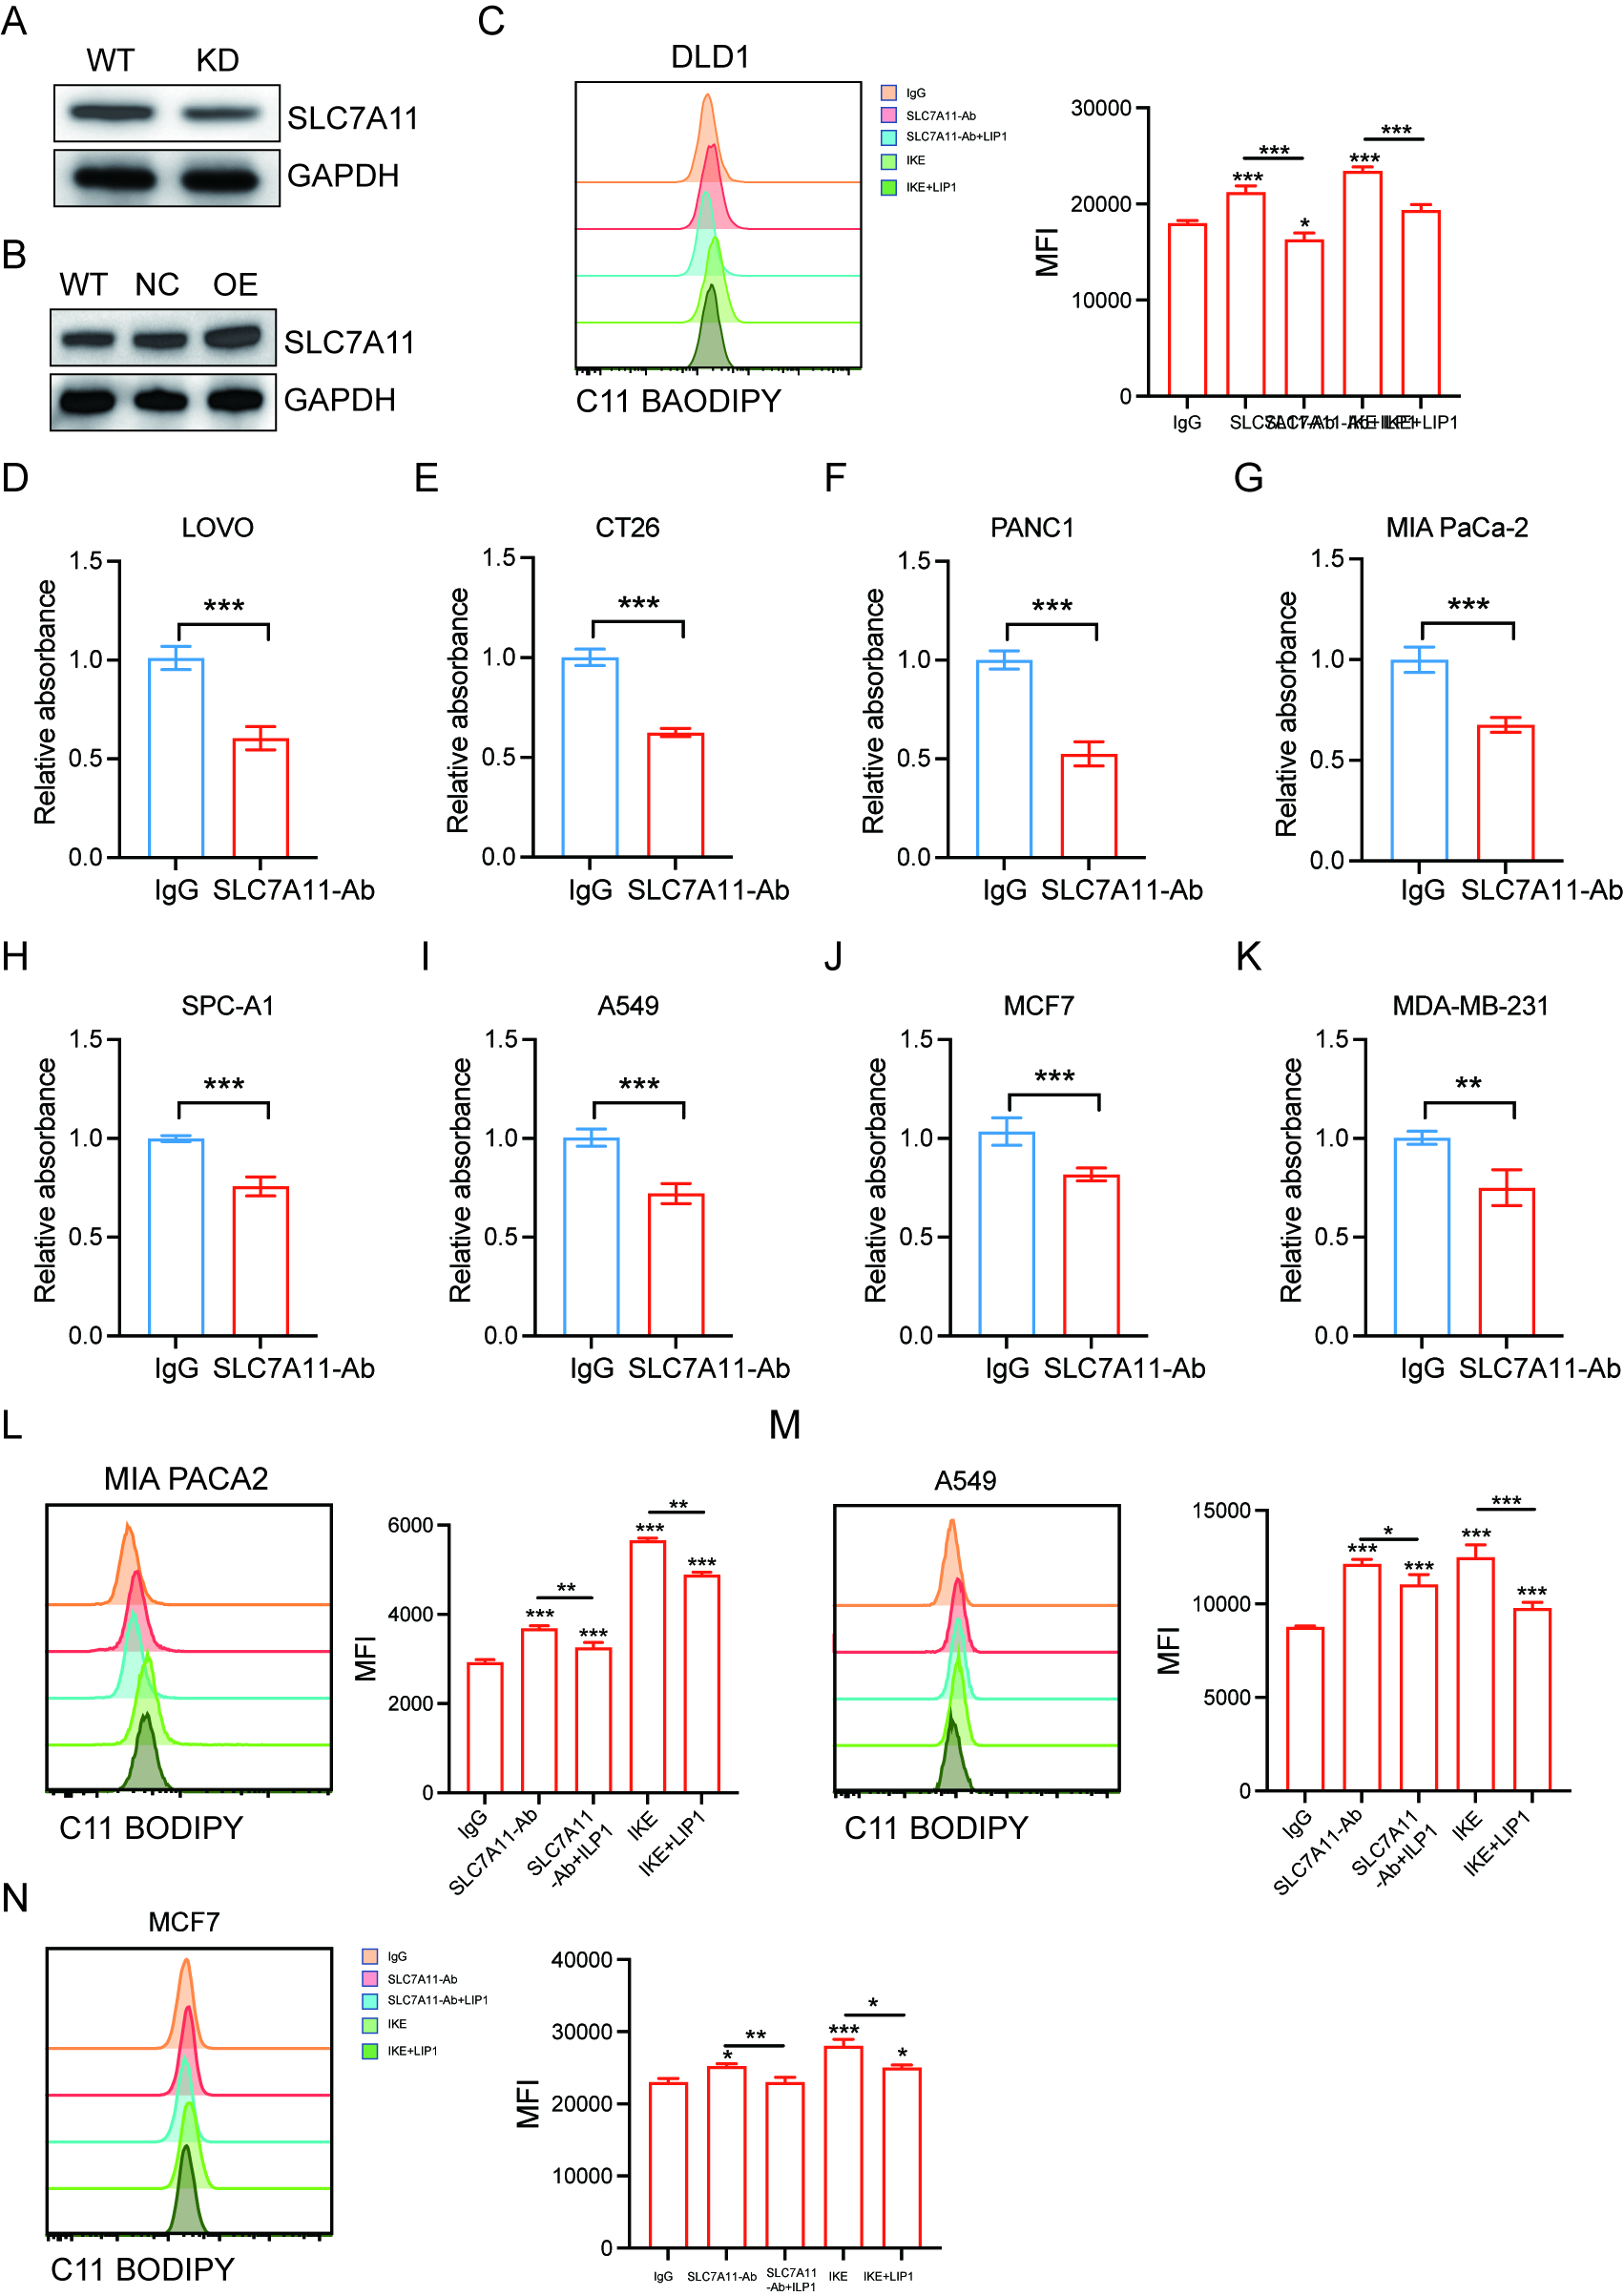
**

**Supplemental figure 2. SLC7A11-Ab inhibits the proliferation of colon cancer cells by targeting the transport function of SLC7A11**

(A-B) Western blot (WB) analysis of SLC7A11 expression in DLD1 cells.

(C) Flow cytometric analysis of C11 BODIPY staining in DLD1 cells treated with SLC7A11-Ab(100ug/ml) or IKE (2uM) for 48 hours, with or without LIP1 (1uM).

(D-K) CCK8 assay results of LOVO, CT26, PANC1, MIA PaCa-2, SPC-A1, A549, MCF7, and MDA-MB-231 after treatment 48h with SLC7A11-Ab.

(L-N) Flow cytometric analysis of C11 BODIPY staining in MIA PACA2, A549 and MCF7 cells treated with SLC7A11-Ab or IKE for 48 hours, with or without LIP1. **p* < 0.05, **p < 0.01, ***p < 0.001.

**Supplemental figure3**


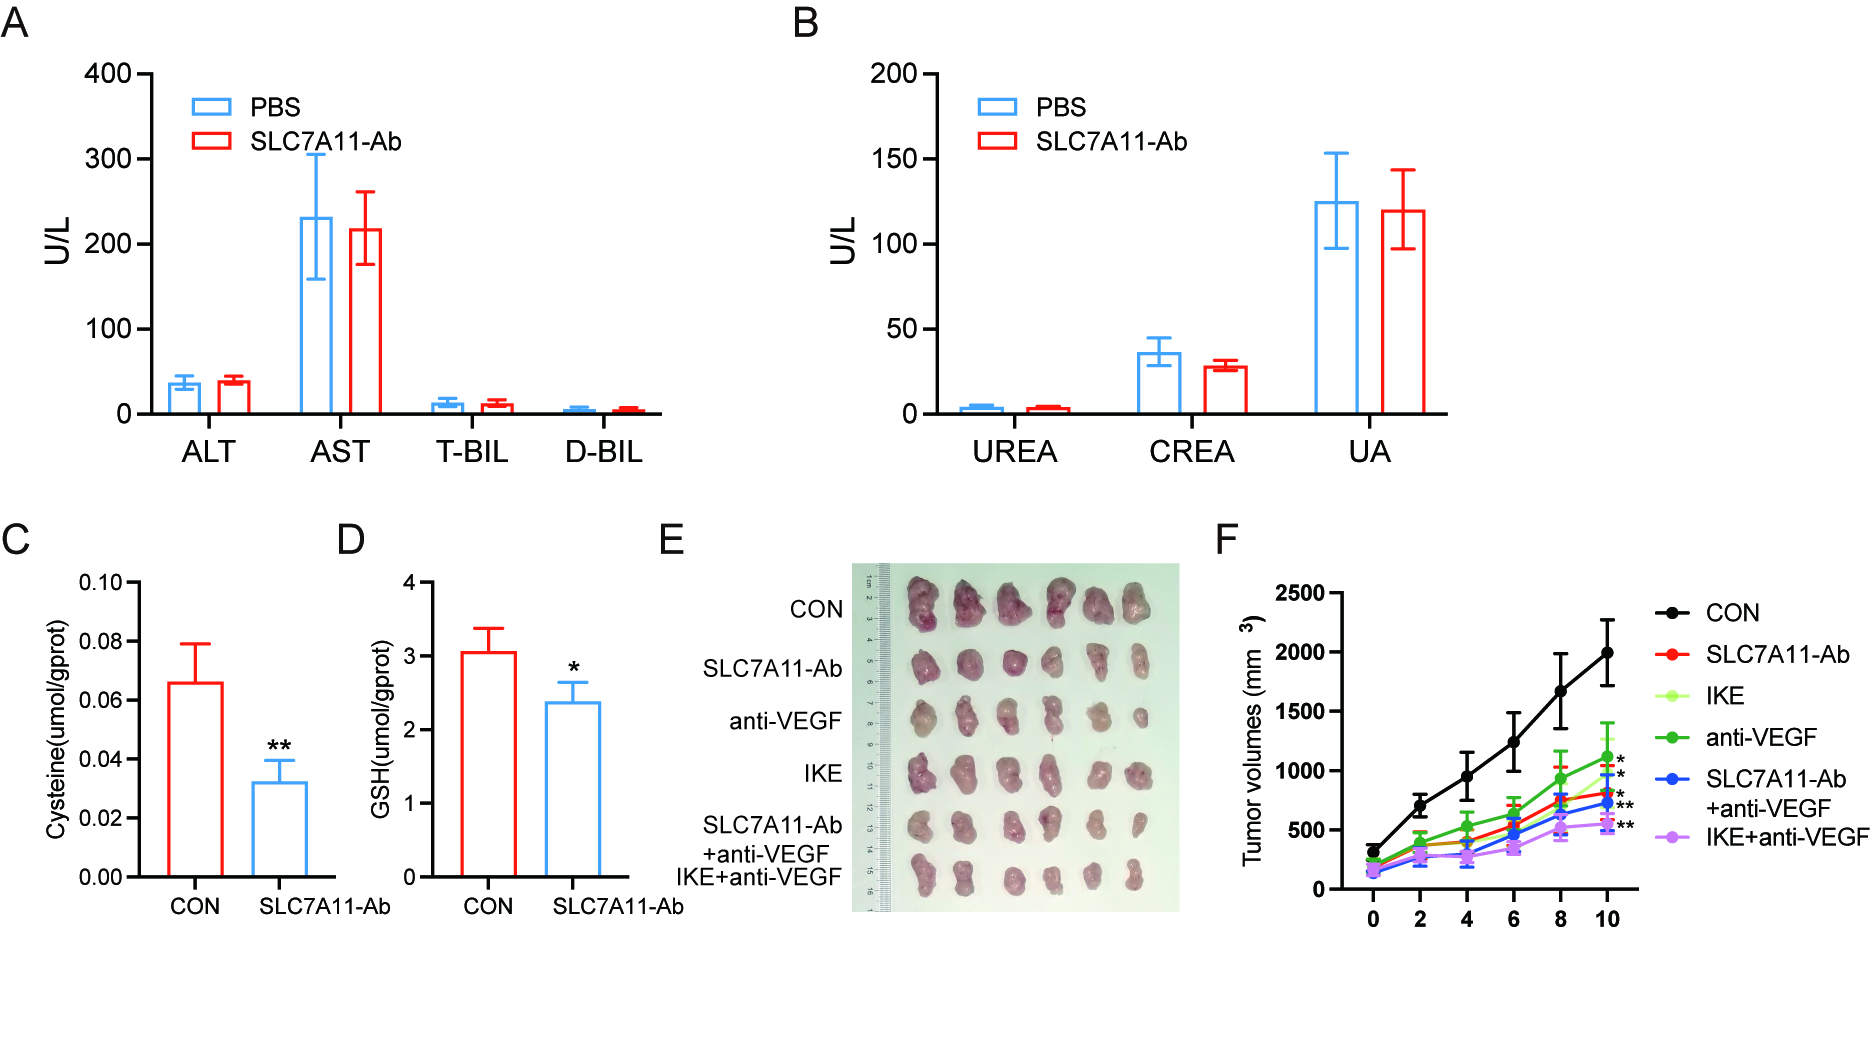


**Supplemental figure 3. SLC7A11-Ab inhibits the development of tumors in vivo**

(A and B) Biochemical analysis of mouse serum after treatment with control antibody or SLC7A11-Ab.

(C)Cysteine levels in tumors after treatment with control antibody or SLC7A11-Ab.

(D)GSH levels in tumors after treatment with control antibody or SLC7A11-Ab.

(E and F) Volume of CT38 tumors from C57/6J intratumorally injected with control antibody, SLC7A11-Ab, IKE, anti-VEGF, IKE with anti-VEGF, or SLC7A11-Ab with anti-VEGF (n=6).**p* < 0.05, ***p* < 0.01, ****p* < 0.001.

**Supplemental figure4**


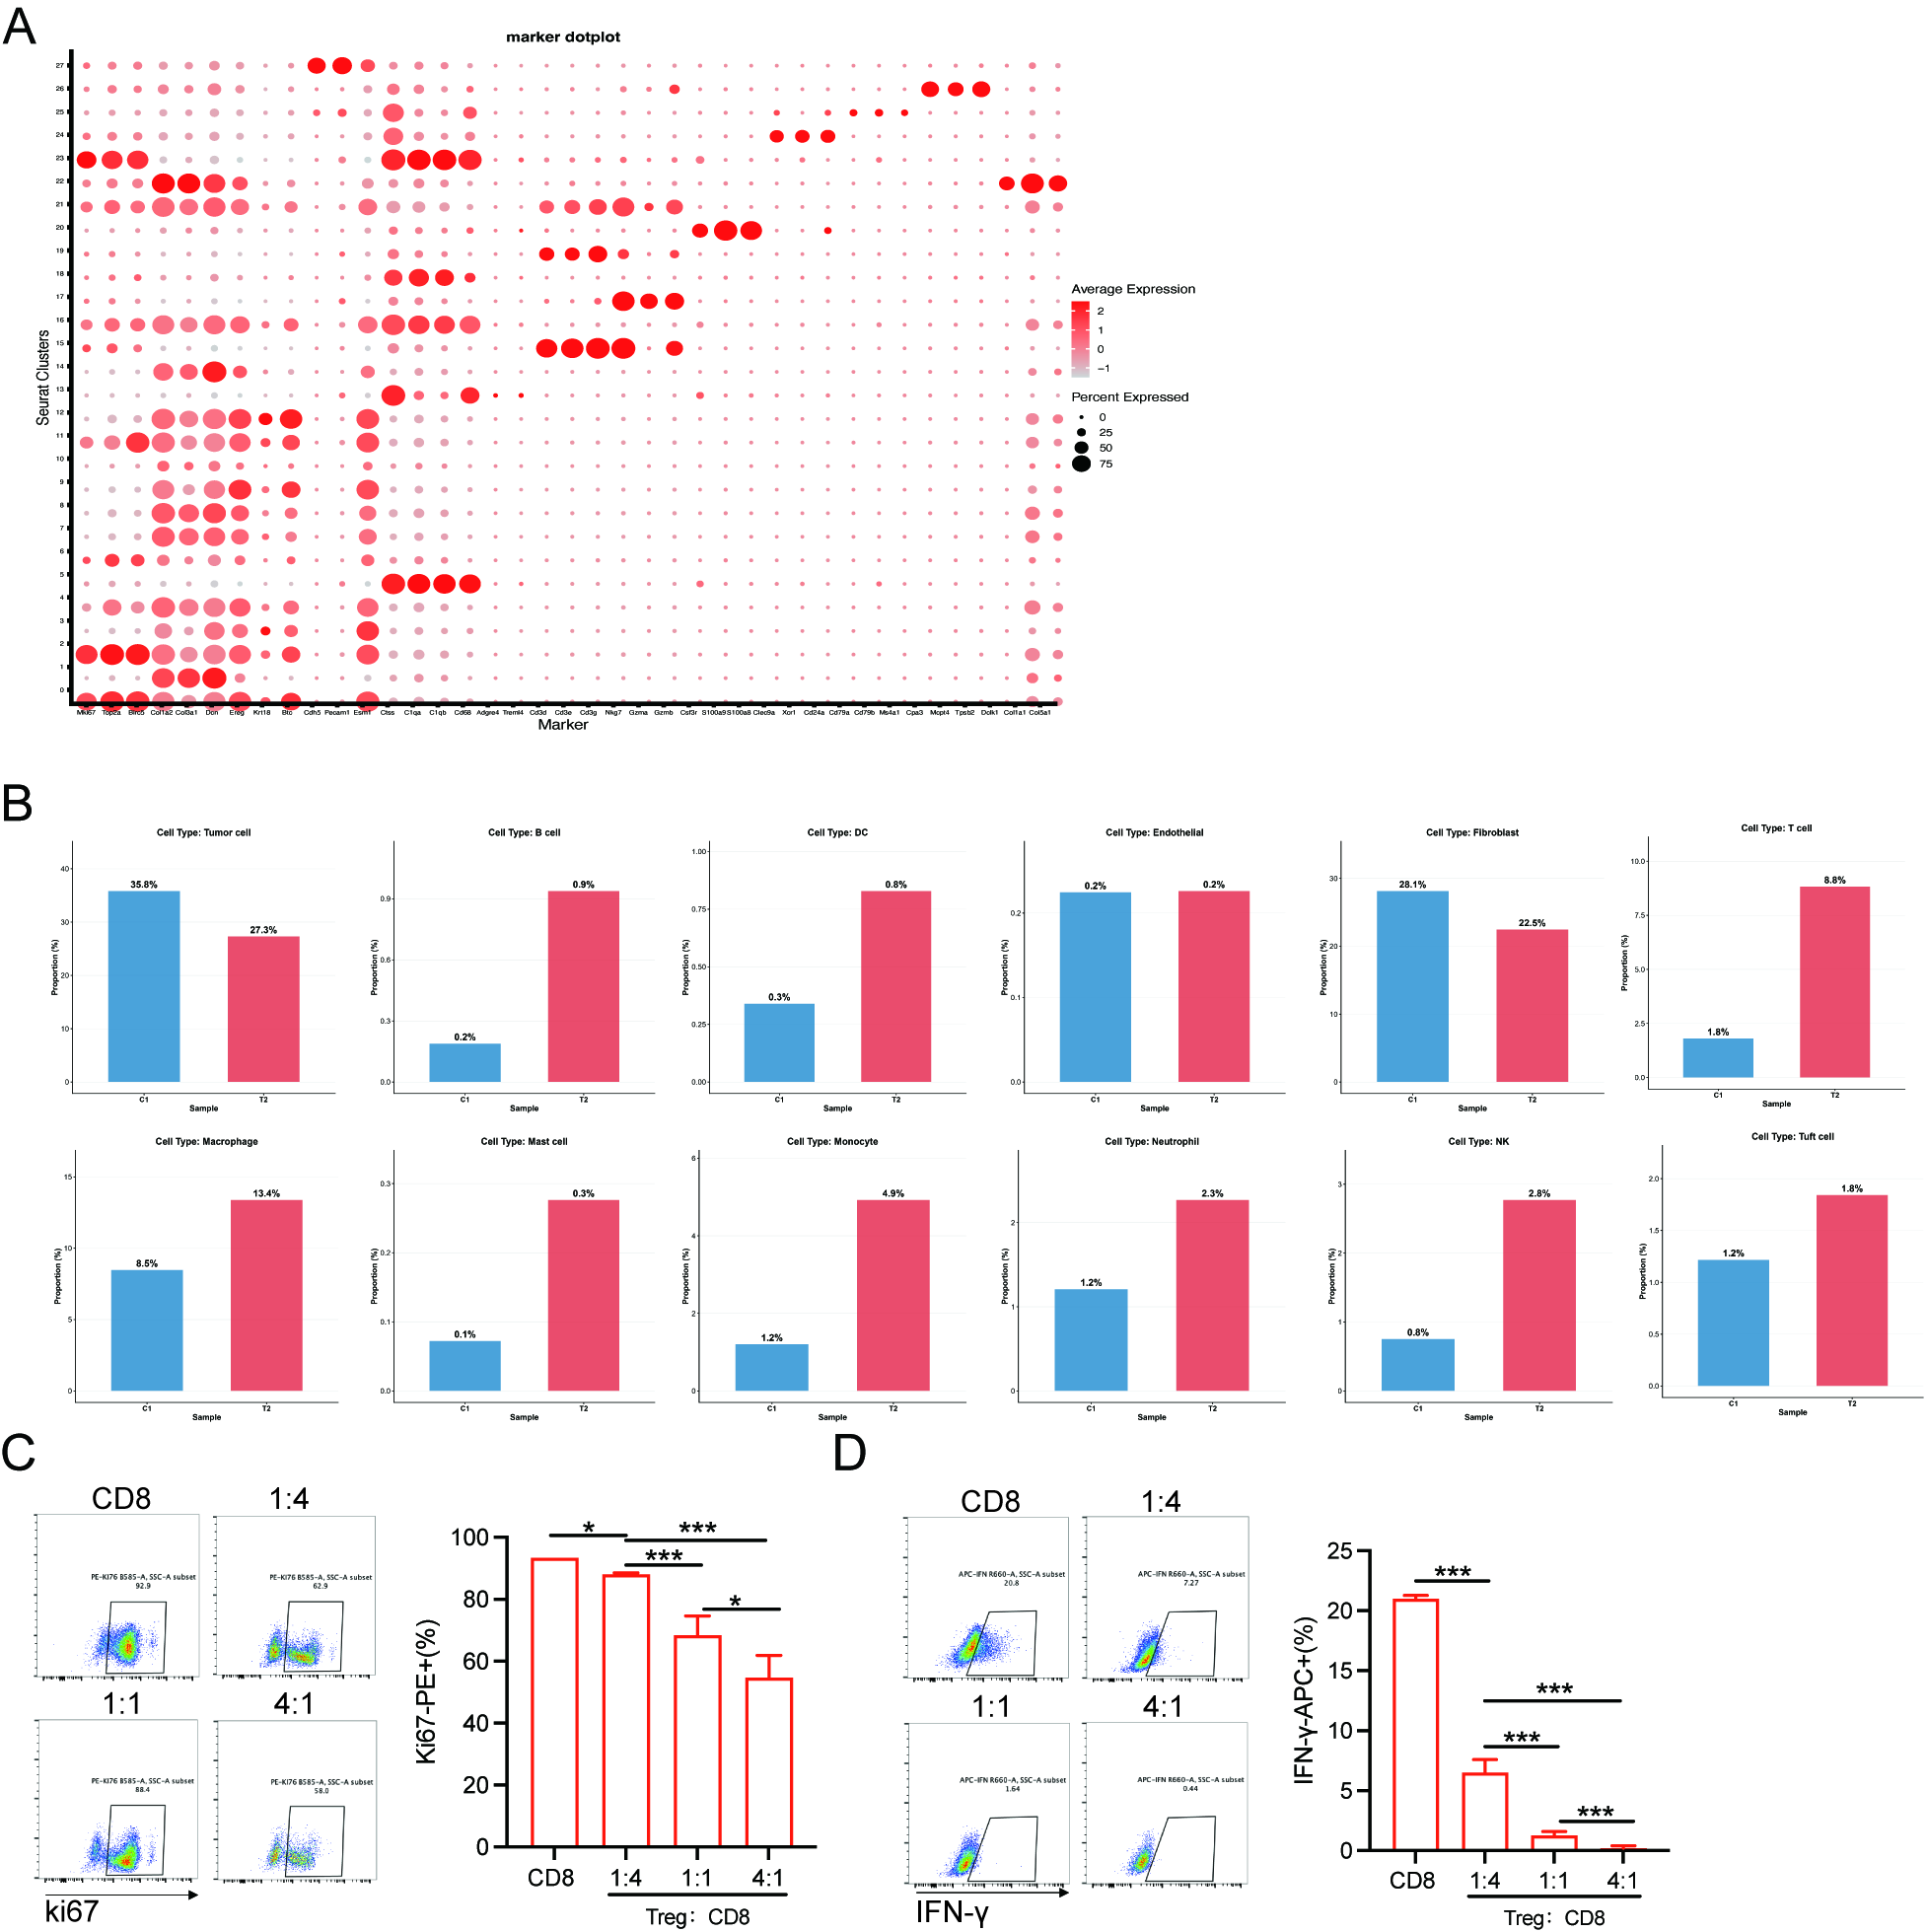


**Supplemental figure 4. SLC7A11-Ab inhibits the proliferation and activation of Tregs**

(A) Bubble plot showing the expression of signature genes of broad cell types.

(B) Bar plots displaying the proportion of specific broad cell types as a fraction of the total cell count across different groups. Each bar represents a biological replicate within certain group, with the height indicating the percentage of particular cell types relative to all cells in that replicate.

(C and D) Flow cytometric analysis of CD8+ T cell proliferation and functional changes after co-culturing with Treg cells at different ratios for 2 days.

**Supplemental figure5**

**
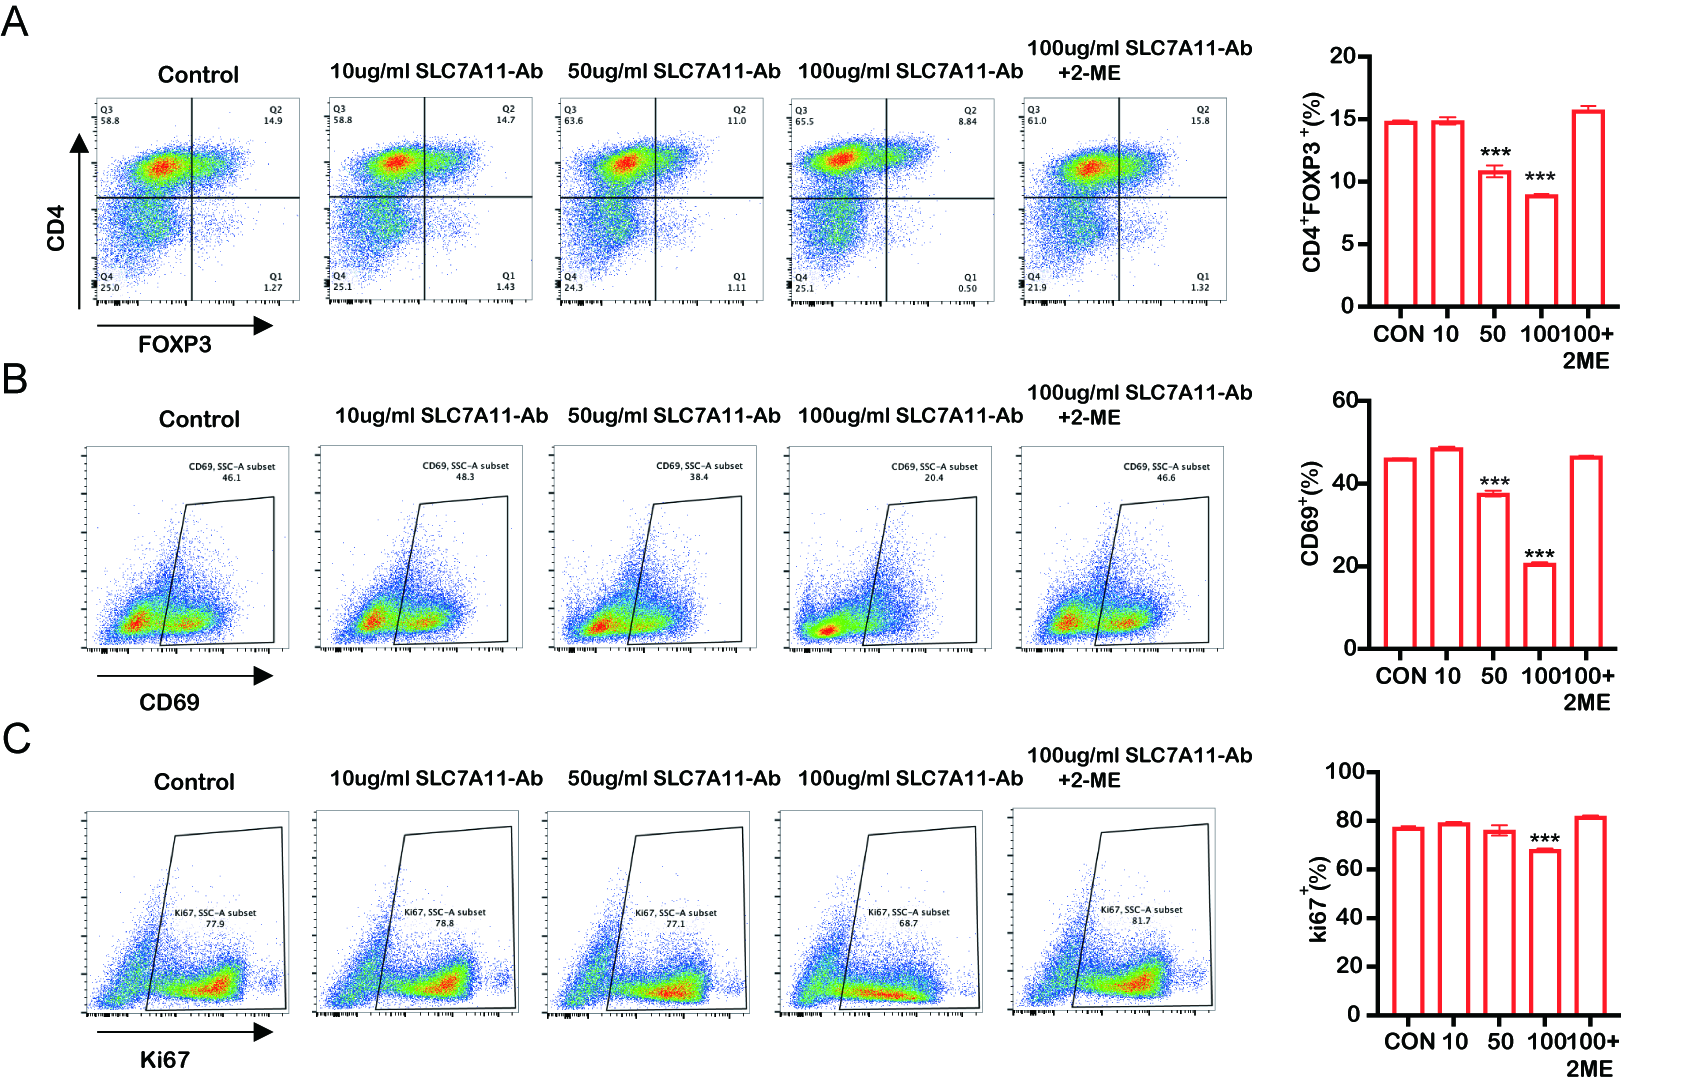
**

**Supplemental figure 5. Impact of SLC7A11-Ab on T cell function**

(A-C) Flow cytometry results for Foxp3, CD4, CD69, and Ki67 expression in CD4 T cells treated with different concentrations of SLC7A11-Ab.
